# Supplementary material for: Three-dimensional NiCoP hollow spheres: an efficient electrode material for hydrogen evolution reaction and supercapacitor applications
Source: PubMed Central journal article supplement — RSC Adv. 2020 Jan 28;10(8):4650–6. doi: 10.1039/c9ra09714g (PMC9049034; doi:10.1039/c9ra09714g), 2020-01-28
Supplement: RA-010-C9RA09714G-s001.pdf [file RA-010-C9RA09714G-s001.pdf]

## Supporting Information

### **Three dimensional NiCoP hollow spheres; efficient electrode material for Hydrogen evolution reaction and Supercapacitor application**

Jiban K. Das<sup>a,b</sup>, Aneeya K. Samantara<sup>a,b</sup>, Saumya Satyarthi<sup>a,b</sup>, Chandra Sekhar Rout<sup>c,\*</sup>

J. N. Behera<sup>a,b,\*</sup>

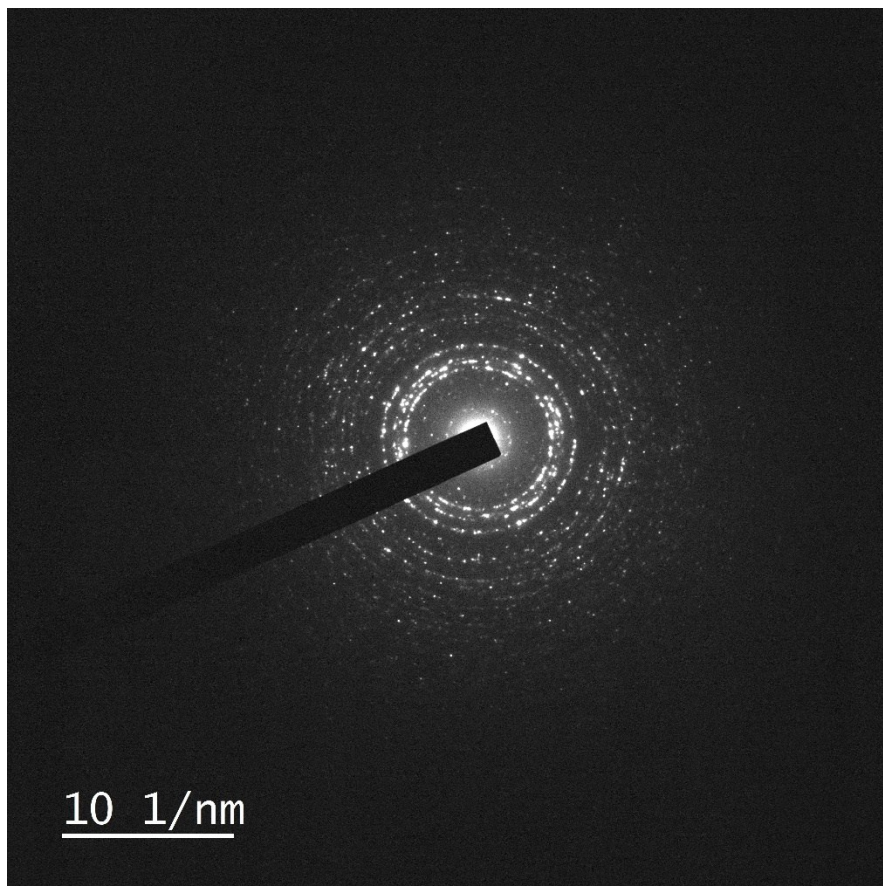

**Fig. S 1** Selected area electron diffraction (SAED) pattern for the NiCoP microspheres

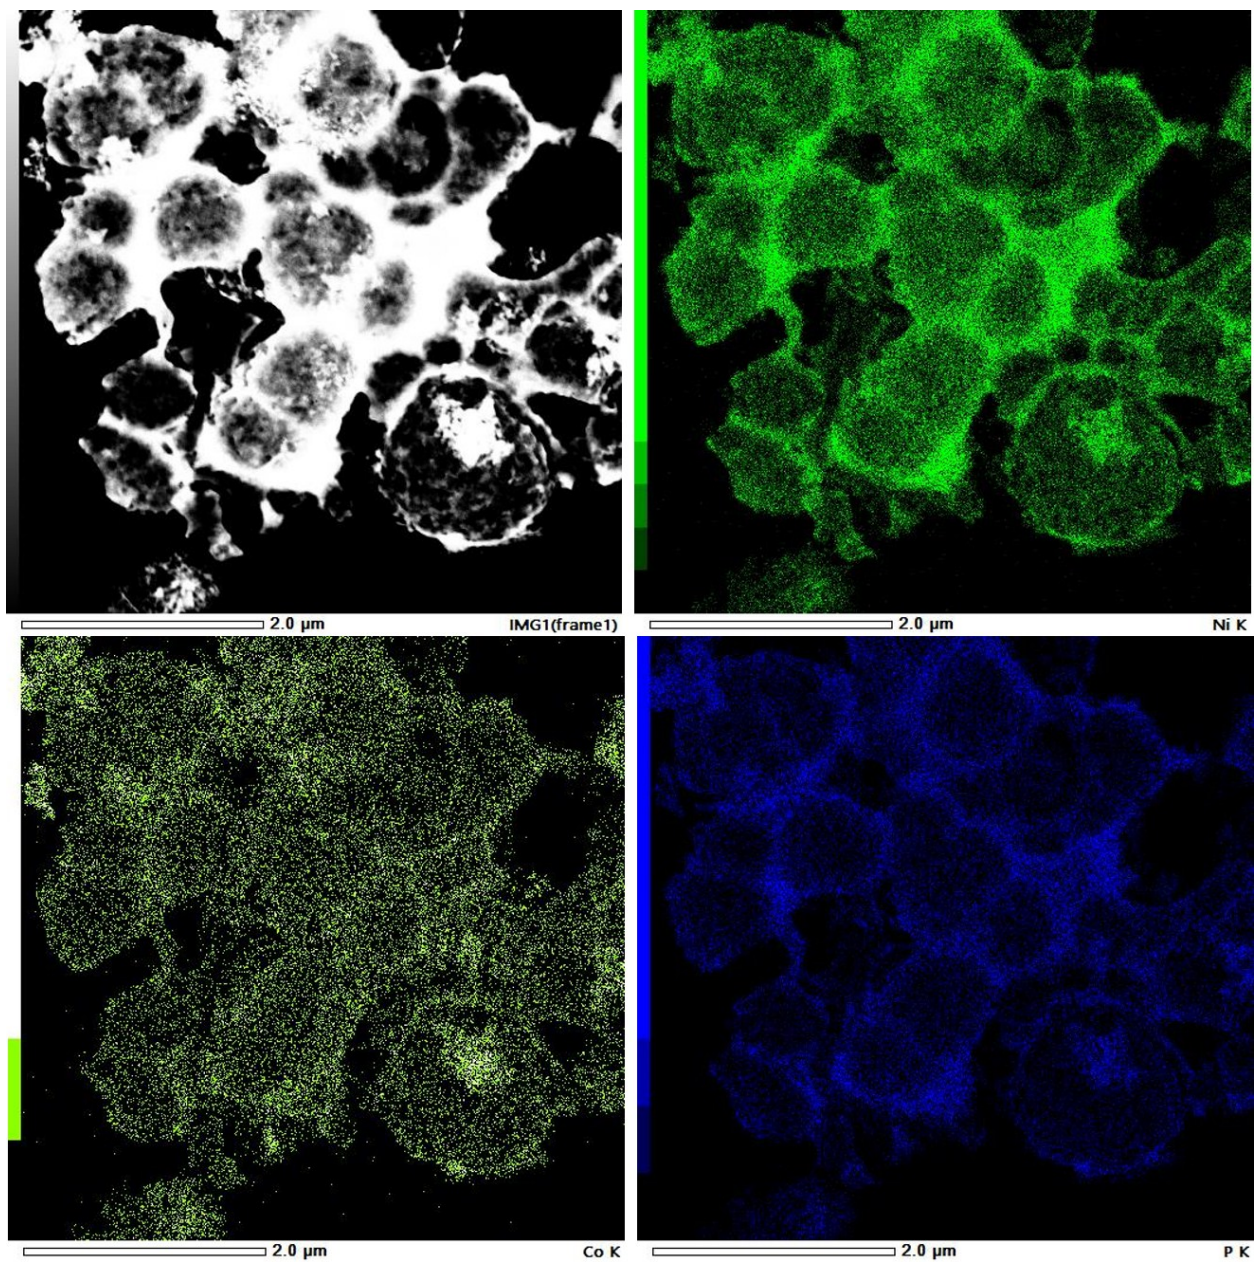

**Fig. S 2** EDS mapping of NiCoP microspheres

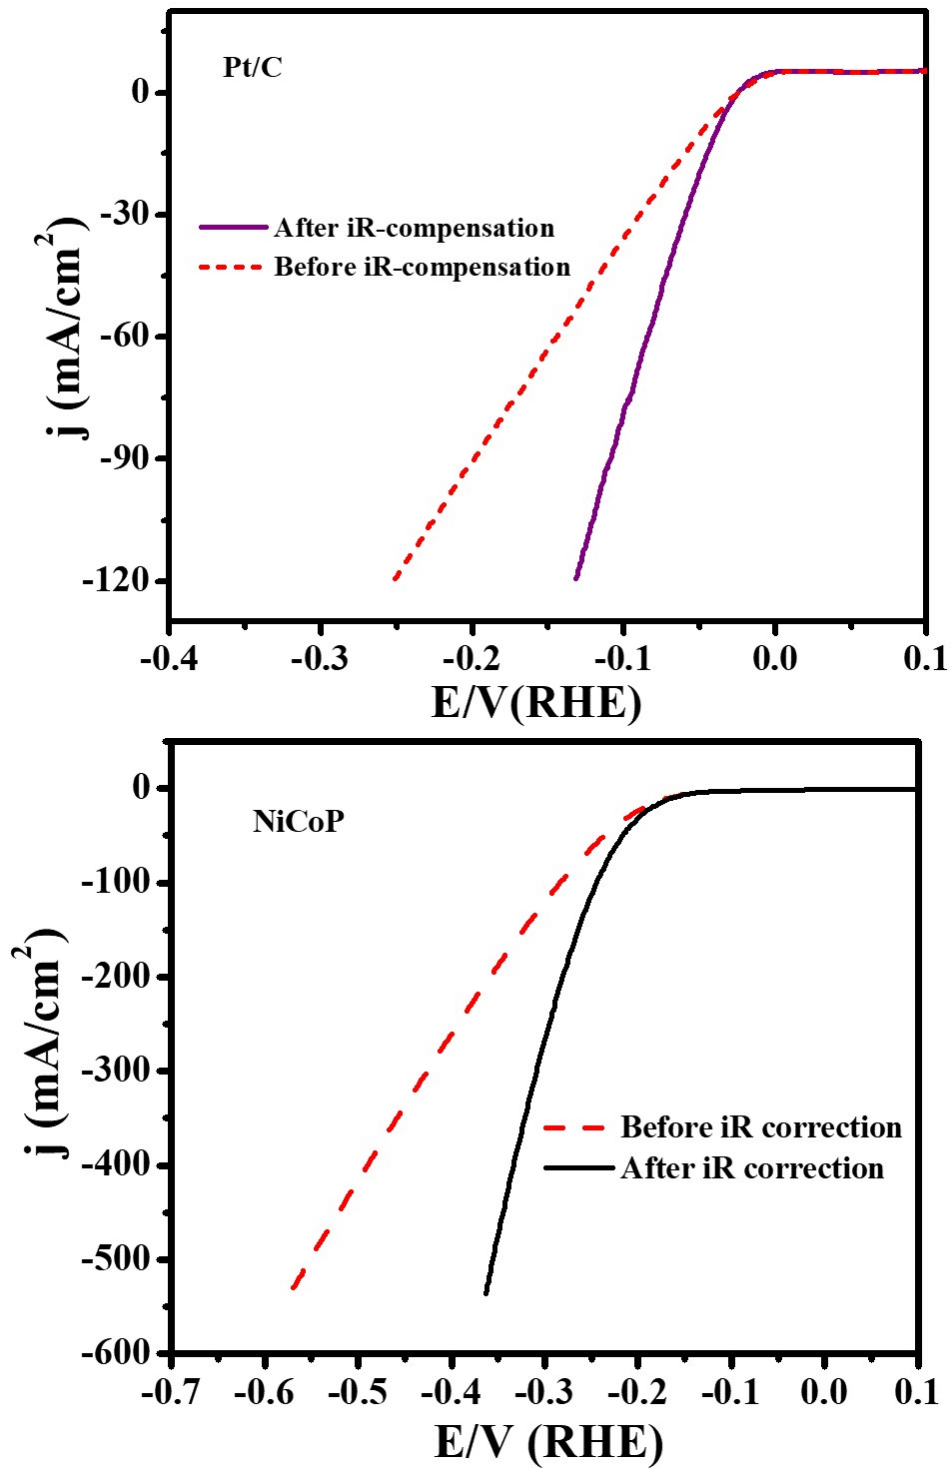

**Fig. S 3** Linear sweep voltammograms of commercial Pt/C and NiCoP microsphere before and after iR correction

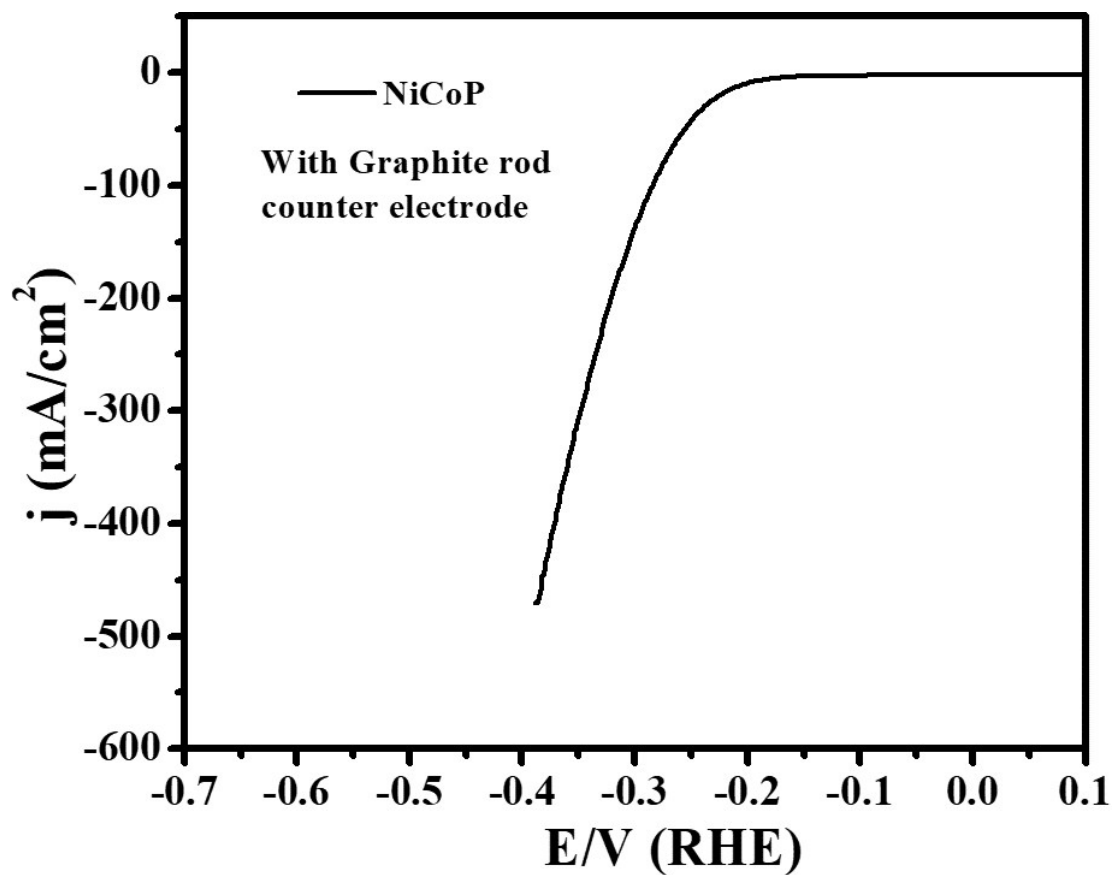

**Fig. S 4** Linear sweep voltammograms of NiCoP modified glassy carbon electrode for HER at a sweep rate of 5 mV/s. Here Graphite rod has been used as the counter electrode.

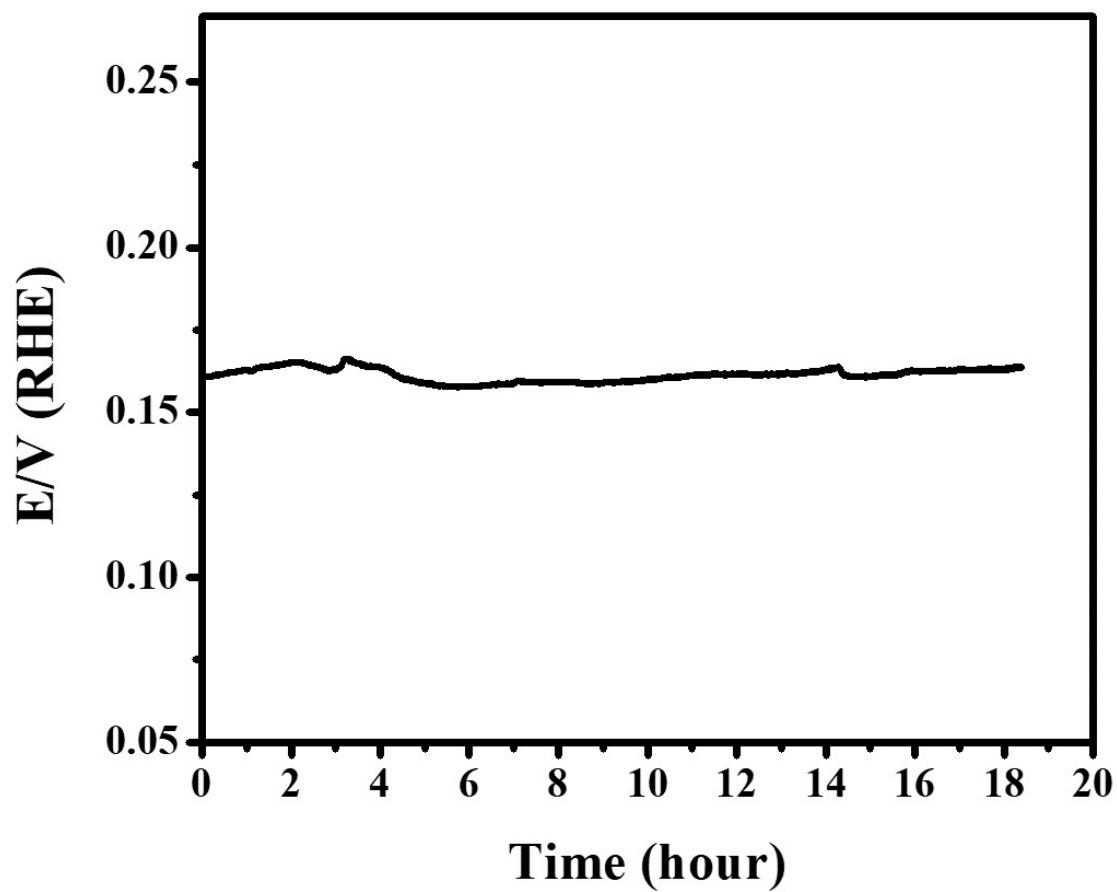

**Fig. S 5** long term stability test for HER at 10 mA/cm<sup>2</sup> current density in 0.5 M H<sub>2</sub>SO<sub>4</sub> with Ag/AgCl reference and graphite rod as counter electrode.

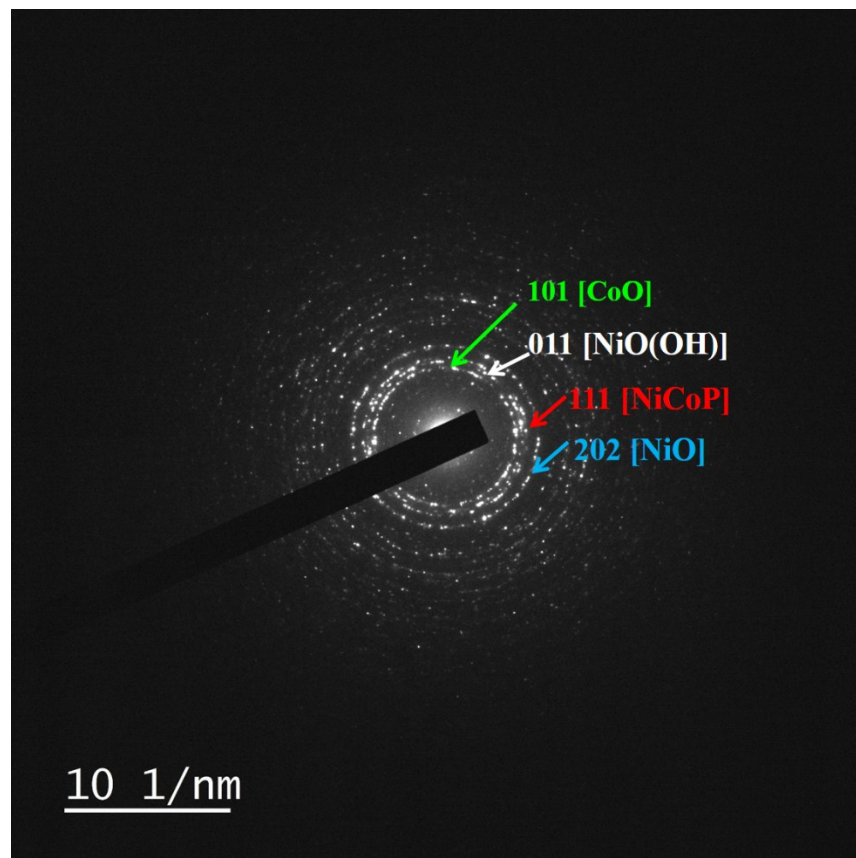

**Fig. S 6** SAED pattern of NiCoP modifies electrode after 10000 repeated cycles in 5M KOH electrolyte.

| Sl No. | Sample                                                                                                 | Electrolyte H <sub>2</sub> SO <sub>4</sub> (M) | Over potential 10mA/cm <sup>2</sup> (mV) | Tafel slope (mV/dec) | Reference |
|--------|--------------------------------------------------------------------------------------------------------|------------------------------------------------|------------------------------------------|----------------------|-----------|
| 1      | Co-NRCNTs                                                                                              | 0.5                                            | 260                                      | 69                   | 1         |
| 2      | Ni-Co-P<br>Ni-Co-P/C <sub>60</sub>                                                                     | 0.5                                            | 97                                       | 58<br>48             | 2         |
| 3      | RGO/WS <sub>2</sub>                                                                                    | 0.5                                            | 229                                      | 73                   | 3         |
| 4      | Freeze-dried WS <sub>2</sub> /rGO after annealing                                                      | 0.5                                            | 265                                      | 58                   | 4         |
| 5      | NiCoP@FePx                                                                                             | 1M KOH<br>0.5                                  | 82.5<br>96                               | 69.1<br>50.16        | 5         |
| 6      | Metallic MoS <sub>2</sub> nanosheets                                                                   | 0.5                                            | 195                                      | 54                   | 6         |
| 7      | NiCoP/NF                                                                                               | 1M KOH                                         | 85                                       | 46                   | 7         |
| 8      | Annealed WS <sub>2</sub> /CC                                                                           | 0.5                                            | 225                                      | 105                  | 8         |
| 9      | Ni-Co-P-300                                                                                            | 1M KOH                                         | 150                                      | 60.6                 | 9         |
| 10     | Ni <sub>12</sub> P <sub>5</sub> Spherical Nano Particles<br>Ni <sub>12</sub> P <sub>5</sub> nanoplates | 0.5                                            | 175<br>128                               | 69.9<br>60.6         | 10        |
| 11     | FeP nanosheets                                                                                         | 0.5                                            | 240                                      | 67                   | 11        |
| 12     | NiCoP                                                                                                  | 0.5                                            | 160                                      | 70                   | This Work |

**Table S 1** The HER performance of different electrocatalysts



| Sl no | Sample                                              | Potential window | Specific capacitance (F/g) | Reference |
|-------|-----------------------------------------------------|------------------|----------------------------|-----------|
| 1     | Co <sub>2</sub> P nanoflowers                       | 0-0.5V           | 416                        | 12        |
| 2     | Ni <sub>2</sub> P nanorods                          | 0- 0.475 V       | 799.2                      | 13        |
| 3     | Ni <sub>2</sub> P particles                         | 0-0.4V           | 823.25                     | 14        |
| 4     | Ni <sub>12</sub> P <sub>5</sub> hollow nanocapsules | 0-0.55V          | 949                        | 15        |
| 6     | NiCoP nanoparticles                                 | 0.1-0.58V        | 646                        | 16        |
| 7     | Ni-P microspheres@MnO <sub>2</sub>                  | 0–0.35 V         | 1130                       | 17        |
| 10    | Ni <sub>5</sub> P <sub>4</sub> particles            | 0-0.4V           | 801.5                      | 14        |
| 11    | NiCoP hollow sphere                                 | 0-0.5V           | 960                        | This work |

**Table S 2.** The Supercapacitor performance of different Transition metal based phosphides

### References

- 1 X. Zou, X. Huang, A. Goswami, R. Silva, B. R. Sathe, E. Mikmeková and T. Asefa, *Angew. Chemie Int. Ed.*, 2014, **53**, 4372–4376.
- 2 Z. Du, N. Jannatun, D. Yu, J. Ren, W. Huang and X. Lu, *Nanoscale*, 2018, **10**, 23070–23079.
- 3 T. A. Shifa, F. Wang, Z. Cheng, X. Zhan, Z. Wang, K. Liu, M. Safdar, L. Sun and J. He, *Nanoscale*, 2015, **7**, 14760–14765.
- 4 J. Yang, D. Voiry, S. J. Ahn, D. Kang, A. Y. Kim, M. Chhowalla and H. S. Shin, *Angew. Chemie Int. Ed.*, 2013, **52**, 13751–13754.
- 5 M. Li, X. Liu and X. Hu, *ACS Sustain. Chem. Eng.*, 2018, **6**, 8847–8855.
- 6 M. A. Lukowski, A. S. Daniel, F. Meng, A. Forticaux, L. Li and S. Jin, *J. Am. Chem. Soc.*, 2013, **135**, 10274–10277.
- 7 C. Yu, F. Xu, L. Luo, H. S. Abbo, S. J. J. Titinchi, P. K. Shen, P. Tsiakaras and S. Yin,

- Electrochim. Acta*, 2019, **317**, 191–198.
- 8 Y. Yan, B. Xia, N. Li, Z. Xu, A. Fisher and X. Wang, *J. Mater. Chem. A*, 2015, **3**, 131–135.
  - 9 Y. Feng, X.-Y. Yu and U. Paik, *Chem. Commun.*, 2016, **52**, 1633–1636.
  - 10 Z. Chen, A. Shan, Y. Cui, R. Wang and C. Chen, *CrystEngComm*, 2019, **21**, 228–235.
  - 11 Y. Xu, R. Wu, J. Zhang, Y. Shi and B. Zhang, *Chem. Commun.*, 2013, **49**, 6656–6658.
  - 12 N. Choudhary, C. Li, J. Moore, N. Nagaiah, L. Zhai, Y. Jung and J. Thomas, *Adv. Mater.*, 2017, **29**, 1605336.
  - 13 Y. Lu, J.-P. Tu, Q.-Q. Xiong, J.-Y. Xiang, Y.-J. Mai, J. Zhang, Y.-Q. Qiao, X.-L. Wang, C.-D. Gu and S. X. Mao, *Adv. Funct. Mater.*, 2012, **22**, 3927–3935.
  - 14 J. Yan, Q. Wang, T. Wei and Z. Fan, *Adv. Energy Mater.*, 2014, **4**, 1300816.
  - 15 X. Li, A. M. Elshahawy, C. Guan and J. Wang, *Small*, 2017, **13**, 1701530.
  - 16 D. Yu, K. Goh, Q. Zhang, L. Wei, H. Wang, W. Jiang and Y. Chen, *Adv. Mater.*, 2014, **26**, 6790–6797.
  - 17 D. Yang, Z. Lu, X. Rui, X. Huang, H. Li, J. Zhu, W. Zhang, Y. M. Lam, H. H. Hng, H. Zhang and Q. Yan, *Angew. Chemie Int. Ed.*, 2014, **53**, 9352–9355.
